# Supplementary material for: Association of Mushrooms and Algae Consumption with Mortality among Chinese Older Adults: A Prospective Cohort Study
Source: MDPI journal article supplement (doi:10.3390/nu14193891), 2022-09-20
Supplement: s1 [file s1]

## Supplementary Materials

**Table S1.** Correlation coefficient between mushrooms and algae and other food groups.

| Food groups          | Mushrooms and Algae |
|----------------------|---------------------|
| Fresh fruits         | 0.24                |
| Fresh vegetables     | 0.15                |
| Meat                 | 0.13                |
| Fish                 | 0.21                |
| Nut                  | 0.35                |
| Legumes              | 0.22                |
| Preserved vegetables | 0.09                |
| Sugar and sweets     | 0.12                |

**Table S2.** Hazard Ratios (95% CI) for mortality according to mushrooms and algae intake patterns from age 60 to the study baseline.

| Intake frequency patterns | Death | Person-years | HR (95% CI)       |
|---------------------------|-------|--------------|-------------------|
| Rare-Rare                 | 3704  | 28532        | Ref               |
| Rare-Occasional           | 1072  | 7606         | 1.00 (0.93, 1.08) |
| Rare-Regular              | 230   | 1562         | 1.00 (0.87, 1.16) |
| Occasional-Rare           | 766   | 4632         | 1.18 (1.09, 1.28) |
| Occasional-Occasional     | 2371  | 23116        | 1.00 (0.95, 1.06) |
| Occasional-Regular        | 247   | 2547         | 0.91 (0.79, 1.05) |
| Regular-Rare              | 57    | 465          | 1.00 (0.77, 1.31) |
| Regular-Occasional        | 123   | 1062         | 1.15 (0.95, 1.40) |
| Regular-Regular           | 336   | 5161         | 0.86 (0.76, 0.98) |

Multivariable models were adjusted for age, gender, ethnicity, level of education, type of residence, marital status, income level, smoking status, alcohol consumption, regular exercise, BMI, mortality-related dietary variables (including fresh fruits, fresh vegetables, meat and poultry, fish and aquatic products, preserved vegetables, nuts, legumes, and sugar and sweets). Abbreviation: HR, Hazard Ratio; CI, Confidence Interval.

**Table S3.** Hazard Ratios (95% CI) for mortality according to intake frequency of mushrooms and algae at age 60.

| Models       | Rare<br>(0-1 time per year) | Occasional<br>(>1 time/year-<4 time/month) | Regular<br>(≥ 1 time/week) | P-trend |
|--------------|-----------------------------|--------------------------------------------|----------------------------|---------|
| Deaths       | 5006                        | 3384                                       | 516                        | -       |
| Person-years | 37700                       | 30295                                      | 6688                       | -       |
| Model 1      | 1 (Referent)                | 0.99 (0.95, 1.03)                          | 0.81 (0.74, 0.89)          | 0.022   |
| Model 2      | 1 (Referent)                | 1.02 (0.97, 1.07)                          | 0.93 (0.84, 1.02)          | 0.695   |
| Model 3      | 1 (Referent)                | 0.99 (0.94, 1.04)                          | 0.96 (0.86, 1.07)          | 0.488   |

Model 1: adjusted for age, gender. Model 2: additionally adjusted for ethnicity, level of education, type of residence, marital status, income level, smoking status, alcohol consumption, regular exercise, and BMI. Model 3: additionally adjusted for major food group consumption, including meat and poultry, fish and aquatic products, preserved vegetables, nuts, legumes, and sugar and sweets at age 60. Abbreviation: CI, confidence interval.

**Table S4.** Sensitivity analyses for the association of mushrooms and algae intake frequency with mortality.

| Intake frequency                                                                                                                                                                 | Deaths | Person-years | HR (95% CI)       | P-value |
|----------------------------------------------------------------------------------------------------------------------------------------------------------------------------------|--------|--------------|-------------------|---------|
| <b>Sensitivity analysis 1*: Further adjusted for chronic diseases, including hypertension, diabetes, heart disease, stroke or cerebrovascular disease, cancer, and dementia.</b> |        |              |                   |         |
| Rare                                                                                                                                                                             | 4546   | 33735        | Ref               | -       |
| Occasional                                                                                                                                                                       | 3574   | 31828        | 0.98 (0.93, 1.03) | 0.387   |
| Regular                                                                                                                                                                          | 817    | 9294         | 0.88 (0.81, 0.96) | 0.003   |
| <b>Sensitivity analysis 2: Excluding participants with chronic diseases.</b>                                                                                                     |        |              |                   |         |
| Rare                                                                                                                                                                             | 3328   | 24482        | Ref               | -       |
| Occasional                                                                                                                                                                       | 2557   | 22203        | 0.98 (0.93, 1.04) | 0.477   |
| Regular                                                                                                                                                                          | 537    | 5618         | 0.88 (0.79, 0.98) | 0.017   |
| <b>Sensitivity analysis 3: treating participants who were lost to follow-up as censored observations at the first follow-up interval.</b>                                        |        |              |                   |         |
| Rare                                                                                                                                                                             | 1917   | 28793        | Ref               | -       |
| Occasional                                                                                                                                                                       | 1637   | 28187        | 0.99 (0.92, 1.07) | 0.754   |
| Regular                                                                                                                                                                          | 364    | 8449         | 0.87 (0.76, 0.99) | 0.034   |

Multivariable models were adjusted for age, gender, ethnicity, level of education, type of residence, marital status, and income level, smoking status, alcohol consumption, regular exercise, BMI, and major food group consumption (including fresh fruits, fresh vegetables, meat and poultry, fish and aquatic products, preserved vegetables, nuts, legumes, and sugar and sweets).

\* Further adjusted for chronic diseases, including hypertension, diabetes, heart disease, stroke or cerebrovascular disease, cancer, and dementia.

Abbreviation: HR, Hazard Ratio; CI, Confidence Interval.
